# Supplementary material for: Unsplit superconducting and time reversal symmetry breaking transitions in Sr2RuO4 under hydrostatic pressure and disorder
Source: Springer Nature journal article supplement (doi:10.1038/s41467-021-24176-8), 2021-06-24
Supplement: 41467_2021_24176_MOESM1_ESM.pdf [file 41467_2021_24176_MOESM1_ESM.pdf]

# Supplementary Information for: "Unsplit superconducting and time reversal symmetry breaking transitions in $\text{Sr}_2\text{RuO}_4$ under hydrostatic pressure and disorder."

Vadim Grinenko,<sup>1,2,\*</sup> Debarchan Das,<sup>3</sup> Ritu Gupta,<sup>3</sup> Bastian Zinkl,<sup>4</sup> Naoki Kikugawa,<sup>5</sup> Yoshiteru Maeno,<sup>6</sup> Clifford W. Hicks,<sup>7,8</sup> Hans-Henning Klauss,<sup>1</sup> Manfred Sigrist,<sup>4,†</sup> and Rustem Khasanov<sup>3,‡</sup>

<sup>1</sup>Institute for Solid State and Materials Physics,  
Technische Universität Dresden, D-01069 Dresden, Germany

<sup>2</sup>Leibniz-Institut für Festkörper- und Werkstofforschung (IFW) Dresden, D-01171 Dresden, Germany

<sup>3</sup>Laboratory for Muon Spin Spectroscopy, Paul Scherrer Institut, CH-5232 Villigen PSI, Switzerland

<sup>4</sup>Institute for Theoretical Physics, ETH Zurich, CH-8093 Zurich, Switzerland

<sup>5</sup>National Institute for Materials Science, Tsukuba 305-0003, Japan

<sup>6</sup>Department of Physics, Kyoto University, Kyoto 606-8502, Japan

<sup>7</sup>Max Planck Institute for Chemical Physics of Solids, D-01187 Dresden, Germany

<sup>8</sup>School of Physics and Astronomy, University of Birmingham, Birmingham B15 2TT, United Kingdom

## Supplementary Note 1: Specific heat of $\text{Sr}_{2-y}\text{La}_y\text{RuO}_4$ at ambient pressure

The specific heat measurements were performed at ambient pressure for several pieces of  $\text{Sr}_{2-y}\text{La}_y\text{RuO}_4$  single crystals.

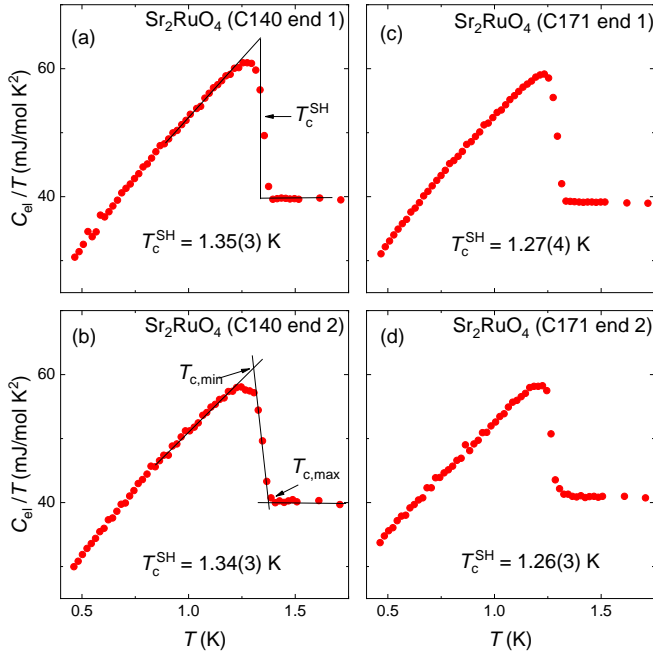

Supplementary Figure 1: Specific heat curves taken for four ending pieces of C140 and C171  $\text{Sr}_2\text{RuO}_4$  rods. The mean value of the 'specific-heat' superconducting transition temperature  $T_c^{\text{SH}}$  is obtained by an equal-entropy construction of the idealized specific heat jump [panel (a)]. The minimum and maximum values of the transition temperature ( $T_{c,\text{min}}$  and  $T_{c,\text{max}}$ ) are determined from the crossing points of linearly extrapolated  $C_{\text{el}}/T$  vs.  $T$  curves in the vicinity of  $T_c$  [panel (b)].

For  $\text{Sr}_2\text{RuO}_4$  used in hydrostatic pressure measurements, the electronic specific heat capacity  $C_{\text{el}}/T$  was measured for four samples: one sample cut from each end of both the C140 and C171 sections. Results are presented in Fig. 1. The specific-heat critical temper-

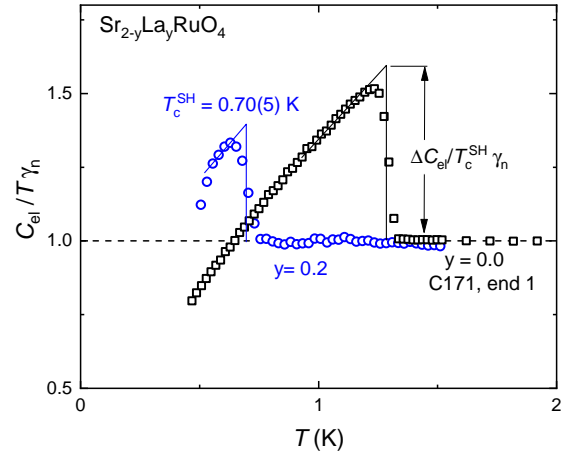

Supplementary Figure 2: Temperature dependence of the normalized electronic specific heat  $C_{\text{el}}/T\gamma_n$  measured on a small piece cut from the  $\text{Sr}_{1.98}\text{La}_{0.02}\text{RuO}_4$   $\mu\text{SR}$  sample (blue open circles). Open squares correspond to the  $C_{\text{el}}/T\gamma_n$  vs.  $T$  data for one of  $\text{Sr}_2\text{RuO}_4$  samples [C171, end 1; Fig. 1(c)]. Solid lines represent an equal-entropy construction used to determine the superconducting transition temperature  $T_c$ . The double-headed arrow represent the way of determination of the specific heat jump at  $T_c$  ( $\Delta C_{\text{el}}/T_c\gamma_n$ ).

ature  $T_c$  of each sample was obtained by an equal-entropy construction, illustrated in panel (a). The spread on the critical temperature of each sample is taken as  $T_{c,\text{max}} - T_{c,\text{min}}$ , where  $T_{c,\text{max}}$  and  $T_{c,\text{min}}$  are determined for each transition as illustrated in panel (b).  $T_c$  was found to be 1.35(3) and 1.34(3) K for the two samples from rod C140, and 1.27(4) and 1.26(3) for those from C171. Because both rods were used in the hydrostatic pressure measurements, we take a combined value  $T_c^{\text{SH}} = 1.30(6)$  K for the specific-heat critical temperature of these samples together.

The temperature dependence of  $C_{\text{el}}/T$  for a small piece cut from the  $\text{Sr}_{1.98}\text{La}_{0.02}\text{RuO}_4$   $\mu\text{SR}$  sample is presented in Fig. 2. The  $C_{\text{el}}/T$  data are normalised by the Sommerfeld coefficient  $\gamma_n$ . The equal-entropy construction and estimates of  $T_{c,\text{min}}$  and  $T_{c,\text{max}}$  result in  $T_c^{\text{SH}} = 0.70(5)$  K.

Note that the 'normalised' data representation allows to make a direct comparison of the specific heat jump

at  $T_c$  ( $\Delta C_{el}/T_c\gamma_n$ ) for samples with different La-doping level, as they measured in the present study, as well as for strained  $\text{Sr}_2\text{RuO}_4$  samples from Ref. 1.

**Supplementary Note 2:  
ZF- and TF- $\mu$ SR results at  $p = 0.25$  and  $p = 0.62$  GPa**

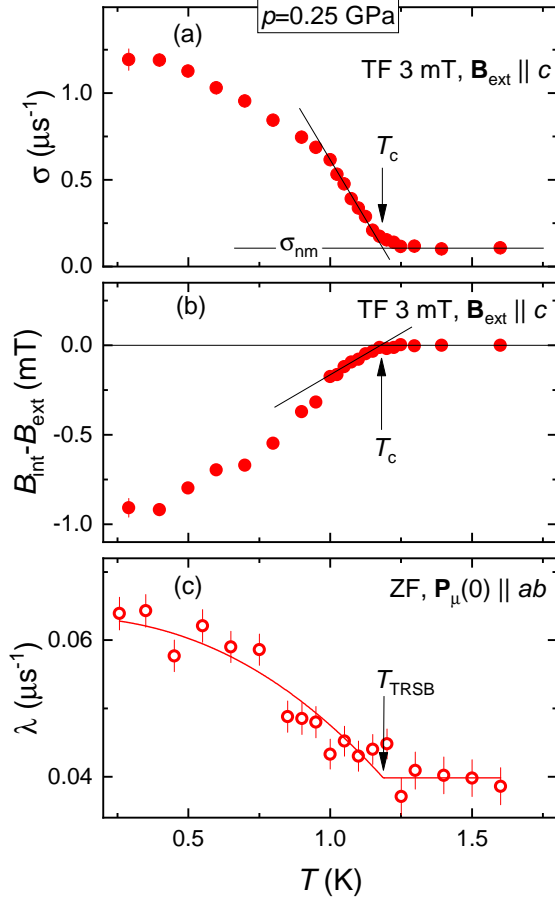

Supplementary Figure 3: (a) Temperature dependence of the Gaussian relaxation rate  $\sigma$  measured at  $p = 0.25$  GPa and the external field  $B_{\text{ext}} = 3$  mT applied parallel to the crystallographic  $c$ -axis. (b) The diamagnetic shift of the internal field  $B_{\text{int}} - B_{\text{ext}} \propto M_{\text{FC}}$  [2],  $M_{\text{FC}}$  is the field-cooled magnetization, at  $p = 0.25$  GPa. Arrows in panels (a) and (b) indicate the position of the superconducting transition temperature  $T_c$ . (c) Temperature dependence of the ZF exponential relaxation rate  $\lambda$  induced by spontaneous magnetic fields caused by TRSB effects at  $p = 0.25$  GPa. The initial muon spin polarization  $\mathbf{P}_\mu(0)$  is parallel to the  $ab$ -plane. The solid line is the fit by means of Eq. 1 from the main text. Arrow indicate the position of TRSB transition temperature  $T_{\text{TRSB}}$ .

Figures 3 and 4 show the results of TF- and ZF- $\mu$ SR measurements on  $\text{Sr}_2\text{RuO}_4$  at  $p = 0.25$  and  $0.62$  GPa. Arrows in panels (a) and (b) indicate the position of the superconducting transition temperature  $T_c$ . Arrow in panel (c) indicate the TRSB transition temperature  $T_{\text{TRSB}}$ .

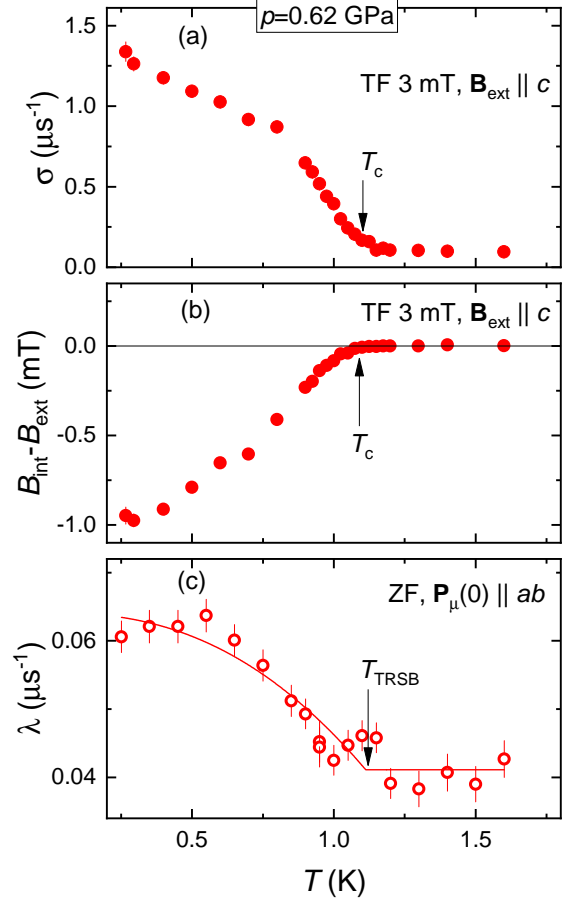

Supplementary Figure 4: The same as in Fig. 3 but for  $p = 0.62$  GPa.

**Supplementary Note 3:  
Extraction of  $T_c$  from the TF- $\mu$ SR data**

The superconducting transition temperature  $T_c$  was extracted from temperature dependencies of the Gaussian relaxation rate,  $\sigma$ , and the diamagnetic shift of the internal field,  $B_{\text{int}} - B_{\text{ext}} \propto M_{\text{FC}}$ , as they obtained in TF- $\mu$ SR experiments [see Figs. 2(b,c), 3(a,b) in the main text and Figs. 4(a,b)].

In a case of  $\sigma(T)$  data, the transition temperature was defined as a crossing point of linearly extrapolated  $\sigma(T)$  curve in the vicinity of  $T_c$  with  $\sigma = \sigma_{\text{nm}}$  line. Note that  $\sigma_{\text{nm}}$  is constant over the entire temperature range and it corresponds to the value reached above  $T_c$  [see Fig. 3(a)].

From the diamagnetic shift data, the transition temperature was defined as a crossing point of linearly extrapolated  $B_{\text{int}} - B_{\text{ext}}$  vs.  $T$  curve in the vicinity of  $T_c$  with  $B_{\text{int}} - B_{\text{ext}} = 0$  line [see Fig. 3(b)].

\* Electronic address: v.grinenko@ifw-dresden.de

† Electronic address: mansigri@ethz.ch

‡ Electronic address: rustem.khasanov@psi.ch

[1] Li, Y.-S., Kikugawa, N., Sokolov, D. A., Jerzembeck, F.,

- Gibbs, A. S., Maeno, Y., Hicks, C. W., Nicklas, M. & Mackenzie, A. P. High sensitivity heat capacity measurements on  $\text{Sr}_2\text{RuO}_4$  under uniaxial pressure. *PNAS* **118** e2020492118; <https://doi.org/10.1073/pnas.2020492118>
- [2] Weber, M., Amato, A., Gygax, F. N., Schenck, A., Maletta, H., Duginov, V. N., Grebinnik, V. G., Lazarev, A. B., Olshevsky, V. G., Pomjakushin, V. Yu., Shilov, S. N., Zhukov, V. A., Kirillov, B. F., Pirogov, A. V., Ponomarev, A. N., Storchak, V. G., Kapusta, S. & Bock, J. Magnetic-flux distribution and the magnetic penetration depth in superconducting polycrystalline  $\text{Bi}_2\text{Sr}_2\text{Ca}_{1-x}\text{Y}_x\text{Cu}_2\text{O}_{8+\delta}$  and  $\text{Bi}_{2-x}\text{Pb}_x\text{Sr}_2\text{CaCu}_2\text{O}_{8+\delta}$ . *Phys. Rev. B* **48**, 13022 (1993).
